# Supplementary material for: Understanding nucleation efficiency of stereocomplex-crystallites on homochiral crystallization in poly( l -lactide)/poly( d -lactide) blends: homogenization near crystal growth front
Source: Royal Society of Chemistry journal article supplement (doi:10.1039/d4lp00319e), 2026-01-01
Supplement: d4lp00319e1.pdf [file d4lp00319e1.pdf]

## Supplementary Information

### Understanding nucleation efficiency of stereocomplex-crystallites on homochiral crystallization in poly (L-lactide)/poly (D-lactide) blends: Homogenization near crystal growth front

Qi Chen<sup>a,b</sup>, Mansurali Mithani<sup>a</sup>, Rafael Auras<sup>c</sup>, Jacob Judas Kain Kirkensgaard<sup>d,e</sup>, Ilke Uysal-Unalan<sup>a,b</sup>

\*

<sup>a</sup> Department of Food Science, Aarhus University, Agro Food Park 48, 8200 Aarhus N, Denmark

<sup>b</sup> CiFOOD – Center for Innovative Food Research, Aarhus University, Agro Food Park, 48, 8200 Aarhus N, Denmark

<sup>c</sup> School of Packaging, Michigan State University, East Lansing, MI 48824-1223, USA

<sup>d</sup> Department of Food Science, University of Copenhagen, 1958 Frederiksberg C, Denmark

<sup>e</sup> Niels Bohr Institute, University of Copenhagen, 2100 Copenhagen Ø, Denmark

\* Corresponding author: Ilke Uysal-Unalan, e-mail:iuu@food.au.dk

## 1. Supplemental Methods

### 1.1. *In situ* small- and wide-angle X-ray scattering

*In situ* small- and wide-angle X-ray scattering (SWAXS) analysis was performed using a Nano-inXider ( $\lambda = 0.154$  nm, Xenocs, Sassenage, France) operated at 50 kV, 0.6 mA, beam size 800  $\mu\text{m}$ , and  $q$  range from 0.01 to 4  $\text{\AA}^{-1}$ . The solvent-casted films prepared by the method described in the main context were measured with an exposure time of 600 s. To study the melting and crystallization behavior of SCPLA during heating, the solvent-casted films were placed in a heating plate (HFSX350, Linkam Scientific Instruments Ltd., Surrey, United Kingdom) under a vacuum and heated from 30 °C to 270 °C at 2 °C/min.

### 1.2. Fourier-Transform Infrared Imaging

FTIR spectra were recorded using a PerkinElmer Spotlight 400 FTIR microscopy system (Massachusetts, USA) equipped with a 16-pixel MCT (mercury cadmium telluride) array detector with a 25  $\mu\text{m}$  pixel

size. The sample thickness was maintained at 15–20  $\mu\text{m}$ . Spectra were collected in the range of 4000–650  $\text{cm}^{-1}$  with a resolution of 4  $\text{cm}^{-1}$ , averaging 8 scans per measurement. The system was equipped with a Linkam THMS600 hot stage (Surrey, UK) for temperature-controlled experiments.

The in-situ FTIR imaging protocol was based on the DSC procedure described in Section 3 of the main text. Briefly, samples were rapidly heated from 30  $^{\circ}\text{C}$  to 270  $^{\circ}\text{C}$  at 100  $^{\circ}\text{C}/\text{min}$ , held at 270  $^{\circ}\text{C}$  for 3 minutes, and then cooled to 30  $^{\circ}\text{C}$  at 10  $^{\circ}\text{C}/\text{min}$ . The films were then subjected to self-nucleation temperatures ( $T_a$ ) of 190  $^{\circ}\text{C}$  and 210  $^{\circ}\text{C}$  for 5 minutes to generate different melt structures. The protocol was further modified to study isothermal HC crystallization under different  $T_a$  conditions. After cooling from 190  $^{\circ}\text{C}$  or 210  $^{\circ}\text{C}$ , the films were held at 140  $^{\circ}\text{C}$  for 30 minutes to monitor HC crystallization.

The collected spectra were processed using OriginPro software for baseline correction and deconvolution with Gaussian fitting. This approach allowed the spatially resolved identification of SC and HC domains and provided detailed insight into how pre-existing SC crystallites influence subsequent HC formation.

## **2. Supplemental results**

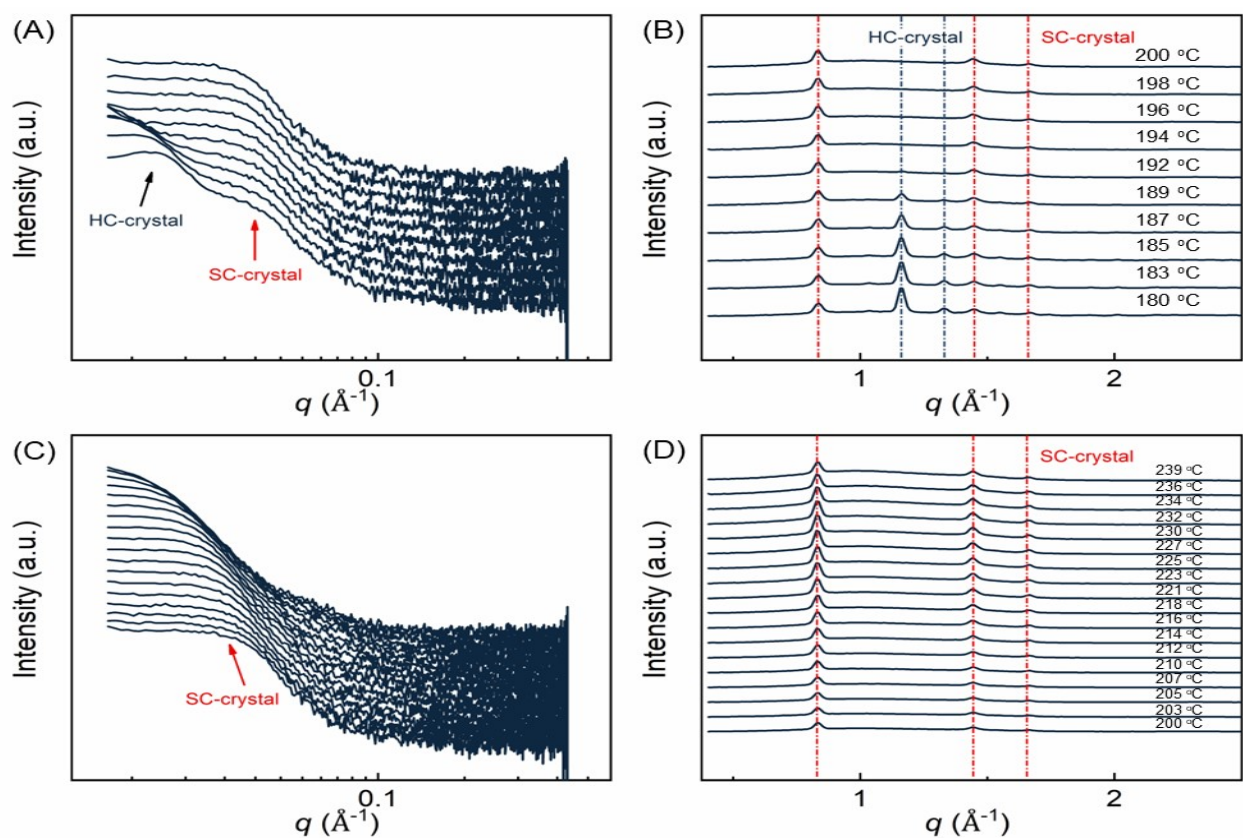

**Figure 1S.** (A) SAXS and (B) WAXS pattern of SCPLA during heating from 180 to 200 °C at 2 °C/min. The long spacing peaks and crystal diffraction of HC and SC-crystals in SAXS and WAXS patterns were marked correspondingly. (C) SAXS and (D) WAXS pattern of SCPLA during heating from 200 to 239 °C at 2 °C/min.

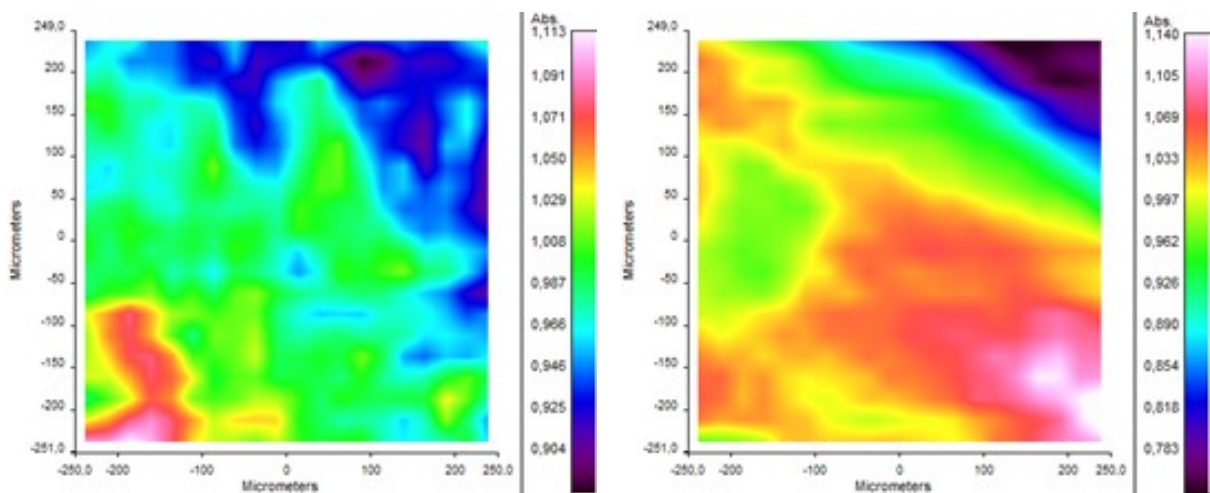

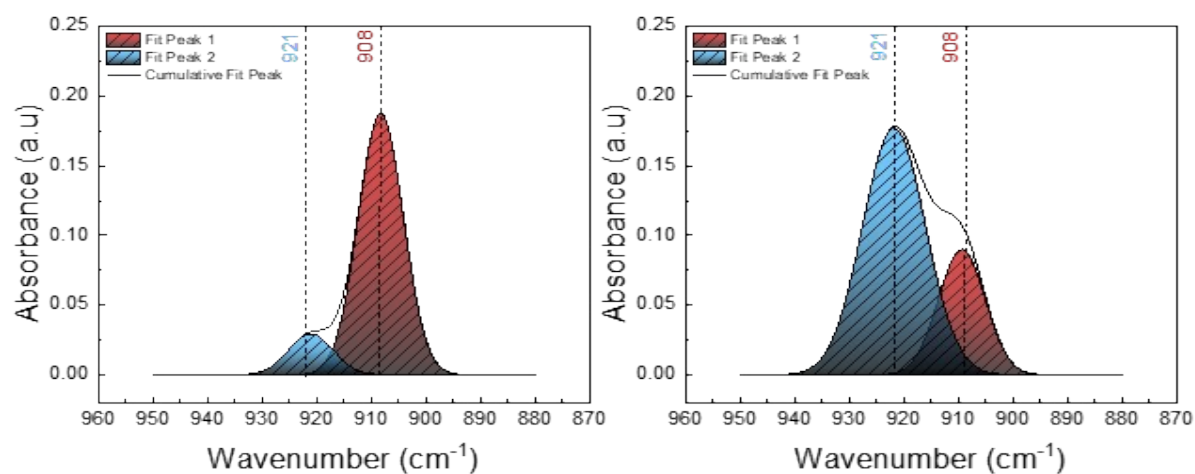

**Fig**

**Figure 2S.** FTIR images and their corresponding FTIR spectra of SCPLA crystallized at  $T_c$  140 °C after 30 min following annealing at (A-C)  $T_a$  220 °C, and (B-D)  $T_a$  190 °C for 5 min.

**Table 1S.** Area calculations based on a Gaussian fit

| Samples                        | SC peak area at 908 | SCPLA crystallized at $T_c$ 140 °C |                     |
|--------------------------------|---------------------|------------------------------------|---------------------|
|                                |                     | HC peak area at 921                | SC peak area at 908 |
| SCPLA annealed at $T_a$ 220 °C | $3.13 \pm 0.86$     | $0.97 \pm 0.10$                    | $2.55 \pm 0.00$     |
| SCPLA annealed at $T_a$ 190 °C | $1.65 \pm 0.35$     | $1.94 \pm 0.10$                    | $1.30 \pm 0.10$     |
